# Supplementary material
Source: Springer Nature journal article supplement (https://www.springermedizin.de/resource/supplementary/13014_2012_665_MOESM1_ESM.pdf/9633860)

### Incidence of erythema (grade $\geq 2$ )

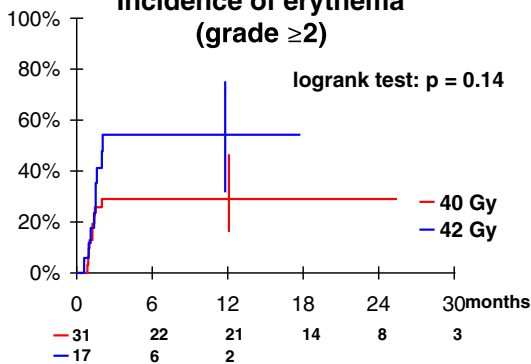

### Incidence of dry skin desquamation (grade $\geq 2$ )

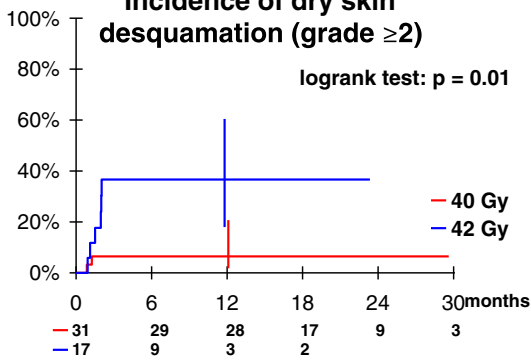

### Incidence of moist skin desquamation (grade $\geq 2$ )

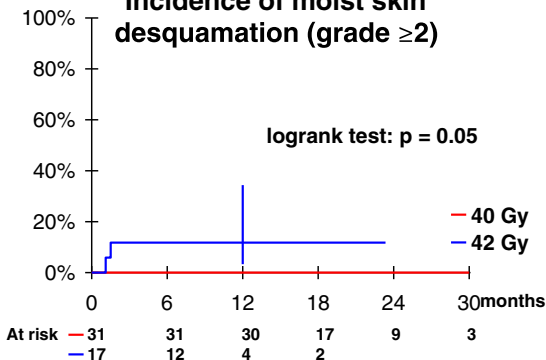

### Incidence of fibrosis (grade $\geq 2$ )

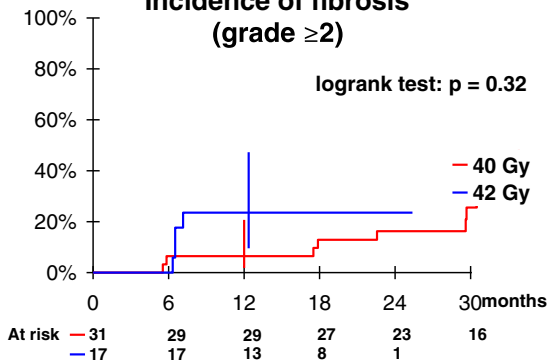

### Incidence of pain (grade $\geq 2$ )

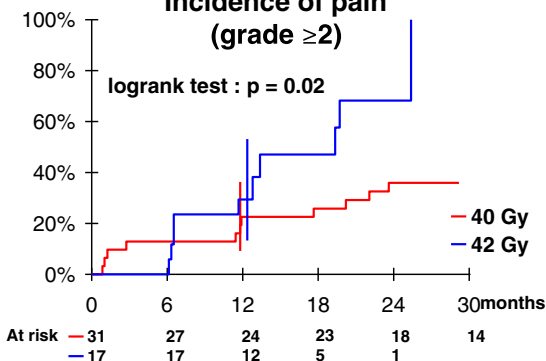

### Incidence of telangiectasia (grade $\geq 2$ )

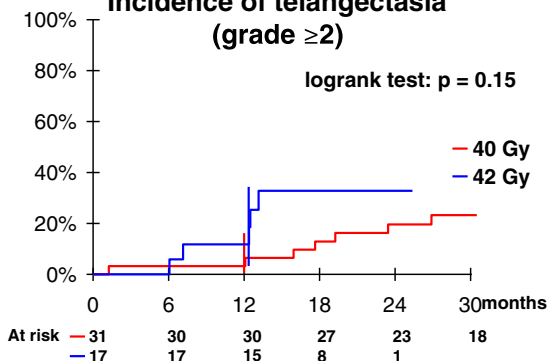

### Incidence of any toxicity\* (grade $\geq 2$ )

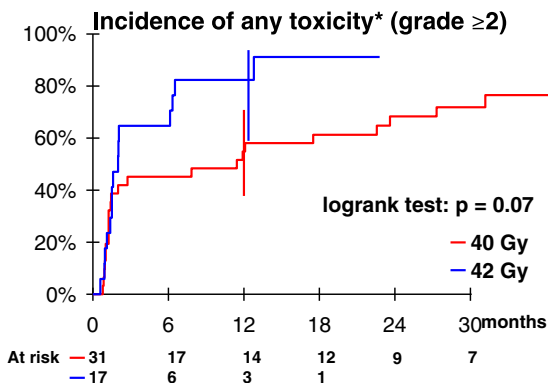

Supplement: MOESM1 [file 9633860]
